# Supplementary material for: The bald and the beautiful: hairlessness in domestic dog breeds
Source: Philos Trans R Soc Lond B Biol Sci. 2017 Feb 5;372(1713):20150488. doi: 10.1098/rstb.2015.0488 (PMC5182420; doi:10.1098/rstb.2015.0488)
Supplement: Supplementary Table 1 [file rstb20150488supp1.xlsx]

## Sheet: Sheet1
Supplemental Table 1. Source of whole genome sequences
Name	Breed	BioProject Number
ACKR01	American Cocker Spaniel	PRJNA288568
AHT01	American Hairless Terrier	PRJNA318762
AIRT02	Airedale Terrier	PRJNA263947
AMAL01	Alaskan Malamute	PRJNA318762
ACD01	Australian Cattle Dog	PRJNA263947
BEAG01	Beagle	PRJNA288568
BELS01	Belgian Sheepdog	PRJNA288568
BLDH01	Bloodhound	PRJNA288568
BMAL01	Belgian Malinois	PRJNA192935
BMD01	Bernese Mountain Dog	PRJNA288568
BMD02	Bernese Mountain Dog	PRJNA318762
BORD02	Border Collie	PRJNA288568
BORT01	Border Terrier	PRJNA263947
BORZ01	Borzoi	PRJNA318762
BOST01	Boston Terrier	PRJNA318762
BOUV01	Bouvier des Flandres	PRJNA318762
BRDC01	Bearded Collie	PRJEB13468
BRIT01	Brittany	PRJNA288568
BRTR01	Black Russian Terrier	PRJNA263947
BSJI01	Basenji	PRJNA274504
BULD01	Bulldog	PRJNA288568
CHIH01	Chihuahua	PRJNA288568
CHOW01	Chow Chow	PRJNA288568
CHOW02	Chow Chow	PRJNA288568
CLSP01	Clumber Spaniel	PRJNA288568
CRES03	Chinese Crested	PRJNA261736
DACH01	Dachshund	PRJEB7736
DANE01	Great Dane	PRJNA288568
DEER01	Scottish Deerhound	PRJNA263947
DOBP01	Doberman Pinscher	PRJNA288568
ECKR02	English Cocker Spaniel	PRJNA263947
ESSP01	English Springer Spaniel	PRJNA263947
EURA01	Eurasier	PRJEB6079
FBUL01	French Bulldog	PRJEB13468
FCR01	Flat-coated Retriever	PRJNA288568
FCR02	Flat-coated Retriever	PRJNA288568
FCR03	Flat-coated Retriever	PRJNA318762
GOLD01	Golden Retriever	PRJNA288568
GPYR01	Great Pyrenees	PRJNA288568
GREY07	Greyhound	PRJNA247491
GREY01	Greyhound	PRJNA288568
GSD01	German Shepherd Dog	PRJNA192935
GSMD01	Greater Swiss Mountain Dog	PRJNA318762
GWHP01	German Wirehaired Pointer	PRJNA318762
HUSK01	Siberian Husky	PRJNA288568
IRTR01	Irish Terrier	PRJEB13468
ISET01	Irish Setter	PRJNA318762
ITGY01	Italian Greyhound	PRJNA288568
IWOF01	Irish Wolfhound	PRJNA288568
IWSP01	Irish Water Spaniel	PRJNA318762
IWSP02	Irish Water Spaniel	PRJNA318762
IWSP03	Irish Water Spaniel	PRJNA318762
JRT01	Jack Russell Terrier	PRJNA263947
KERY01	Kerry Blue Terrier	PRJNA263947
KOMO01	Komondor	PRJNA318762
KROM01	Kromfohrlander	PRJEB6076
LAB04	Labrador Retriever	PRJNA263947
LAGO01	Lagotto Romagnolo	PRJNA318762
MAST01	Mastiff	PRJNA288568
MPOO01	Miniature Poodle	PRJNA318762
MSNZ01	Miniature Schnauzer	PRJNA263947
NLUN01	Norwegian Lundehund	PRJNA186960
NSDT01	Nova Scotia Duck Tolling Retriever	PRJNA263947
PEKE01	Pekingese	PRJNA288568
PEMB02	Pembroke Welsh Corgi	PRJNA263947
PNTR01	Pointer	PRJNA288568
POPO01	Portuguese Podengo	PRJNA263947
PTWD01	Portugese Water Dog	PRJNA318762
PUG05	Pug	PRJNA288568
RHOD01	Rhodesian Ridgeback	PRJNA288568
ROTT01	Rottweiler	PRJNA288568
ROTT04	Rottweiler	PRJNA318762
SALU01	Saluki	PRJNA288568
SAMO01	Samoyed	PRJNA318762
SCOT01	Scottish Terrier	PRJNA288568
SCOT02	Scottish Terrier	PRJNA318762
SCWT01	Soft Coated Wheaten Terrier	PRJNA263947
SLOU01	Sloughi	PRJEB13468
SPOO01	Standard Poodle	PRJNA288568
SPWD01	Spanish Water Dog	PRJEB7903
SSHP01	Shetland Sheepdog	PRJNA288568
SSNZ01	Standard Schnauzer	PRJNA263947
STBD01	Saint Bernard	PRJNA288568
TERV01	Belgian Tervuren	PRJNA288568
TIBM01	Tibetan Mastiff	PRJNA192935
TIBT01	Tibetan Terrier	PRJNA263947
TPOO01	Toy Poodle	PRJNA288568
WHWT01	West Highland White Terrier	PRJNA288568
WHWT02	West Highland White Terrier	PRJNA318762
YORK01	Yorkshire Terrier	PRJNA318762
